# Supplementary material for: PICK1 is essential for insulin production and the maintenance of glucose homeostasis
Source: PubMed Central journal article supplement — Mol Biol Cell. 2018 Mar 1;29(5):587–96. doi: 10.1091/mbc.E17-03-0204 (PMC6004578; doi:10.1091/mbc.e17-03-0204), 2018-03-01
Supplement: mbc-29-587-s001.pdf [file mbc-29-587-s001.pdf]

# Supplemental Materials

*Molecular Biology of the Cell*

Li et al.

# Figure S1

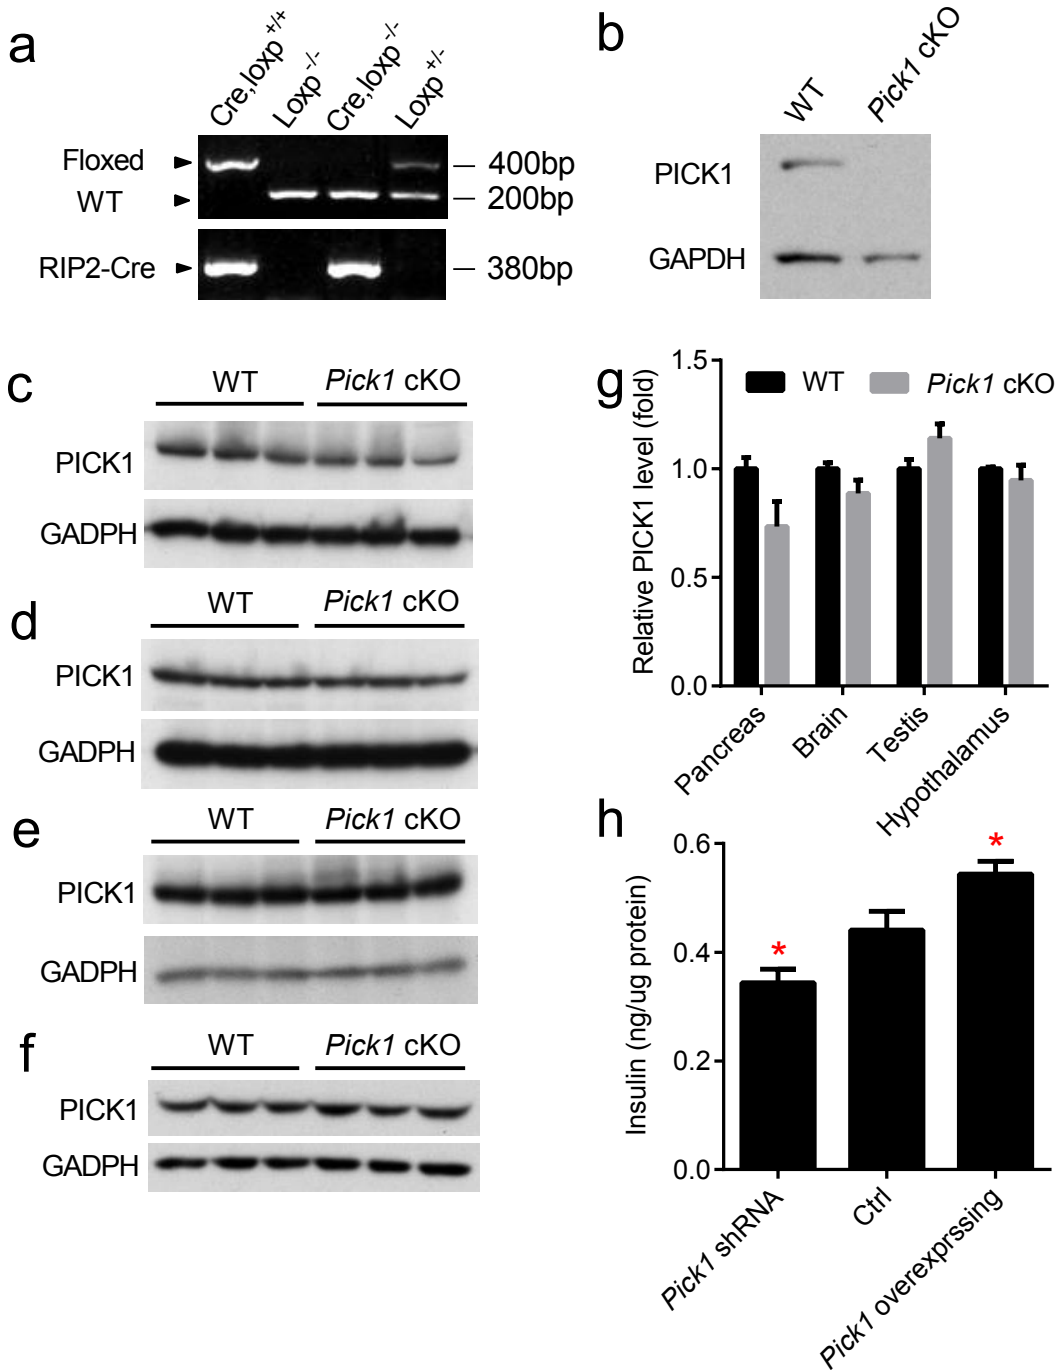

**Fig. S1.**(a) Representative PCR genotyping results of the indicated genotypes. (b) Western blot analysis of isolated islets from WT and cKO mice aged 4 months old. (c-f) Western blot analysis of PICK1 in the pancreas, brain, testis and hypothalamus from 5-month-old control and PICK1 cKO animals. (g) Relative PICK1 protein level was measured and normalized to that of GAPDH, n=3 per group. (h) Evaluation of insulin in INS1E cells with reduced or overexpressed PICK1. Data are represented as the mean  $\pm$  SEM. \*P<0.05; two sided student's t-test.

## Figure S2

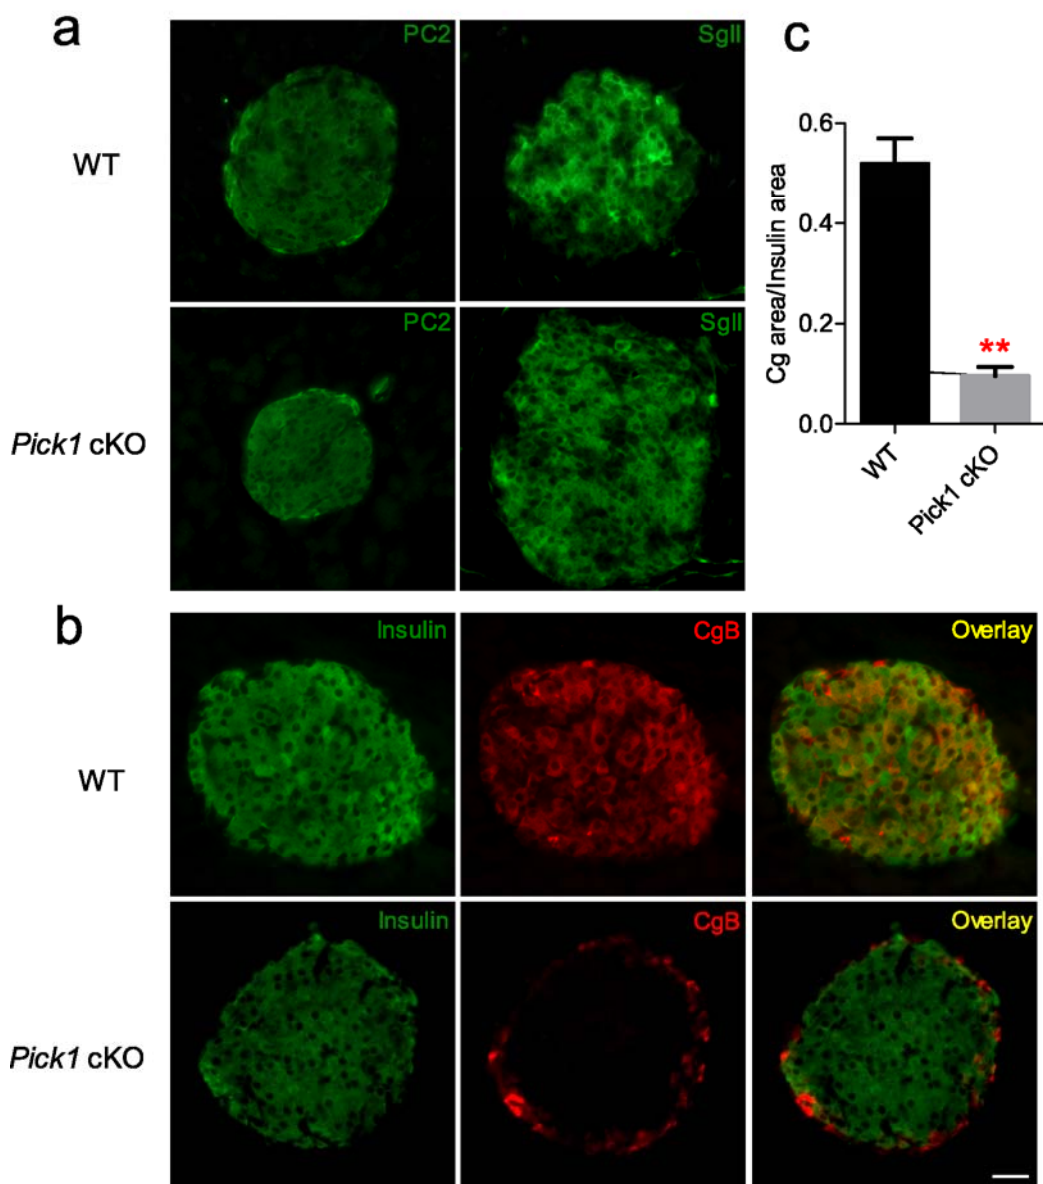

**Fig. S2.**(a-b) Pancreatic sections from 5-month-old mice of the indicated genotypes were stained with antibodies against PC2 (a, left) or SgII(a, right), insulin (b, green) and CgB (b, red). Scale bar represents 50  $\mu$ m. SgII, secretogranin II. (c) Quantification analysis of the CgB/insulin area. 20 islets were calculated per group. Data are represented as the mean  $\pm$  SEM. \*\* $P < 0.01$ ; two sided student's t-test.

**Table S1. Q-PCR Primer Sequence**

| Gene           | Forward                  | Reverse                  |
|----------------|--------------------------|--------------------------|
| <i>Pdx1</i>    | TTTGAAGTCAGTCAGTTGCTCCTT | CCTTCAACCCCTCTCTTGCTATT  |
| <i>Mafa</i>    | AGGAGGTCATCCGACTGAAACAGA | ATTTCCTTGTACAGGTCCCCT    |
| <i>Ins1</i>    | TGGCTTCTTCTACACACCCAAGTC | ACTGATCCACAATGCCACGCTTCT |
| <i>Ins2</i>    | GTGGCTTCTTCTACACACCCATGT | GCACTGATCTACAATGCCACGCTT |
| <i>Pax6</i>    | ACAACGACGAAAGAGAGG       | ACAAAGACACCACCAAGC       |
| <i>NeuroD1</i> | TCAGCATCAATGGCAACTTC     | AAGATTGATCCGTGGCTTTG     |
| <i>CHOP</i>    | CCACCACACCTGAAAGCAGAA    | AGGTGAAAGGCAGGGACTCA     |
| <i>sXbp1</i>   | CTGAGTCCGAATCAGGTGCAG    | GTCCATGGGAAGATGTTCTGG    |
| <i>Xbp1</i>    | TGGCCGGGTCTGCTGAGTCCG    | GTCCATGGGAAGATGTTCTGG    |
| <i>ATF4</i>    | GGGTTCTGTCTTCCACTCCA     | AAGCAGCAGAGTCAGGCTTTC    |
| <i>Pc1/3</i>   | AATGGGCGGGCGGAGAT        | CCAAAAGGTCATACCCAGTTC    |
| <i>Pc2</i>     | GCTGGACCAGCCCTTTATGA     | ATGTCGATCAGTTGAGGCATGT   |
| <i>Cpe</i>     | CTGATCCACAGCACCCGAAT     | GCGATGCGGCTTTCTCA        |
| <i>Actin</i>   | CTGAATGGCCAGGTCTGA       | CCCTGGCTGCCTCAACAC       |
| <i>Gapdh</i>   | GGTGAAGGTCGGTGTGAACG     | CTCGCTCCTGGAAGATGGTG     |
